# Supplementary material for: Improving Anti-Coking Properties of Ni/Al2O3 Catalysts via Synergistic Effect of Metallic Nickel and Nickel Phosphides in Dry Methane Reforming
Source: Materials (Basel). 2022 Apr 22;15(9):3044. doi: 10.3390/ma15093044 (PMC9101347; doi:10.3390/ma15093044)
Supplement: Supplementary file 1 [file materials-15-03044-s001.zip › materials-1684337-supplementary.pdf]

Supplementary information for

# Improving Anti-coking Properties of Ni/Al<sub>2</sub>O<sub>3</sub> Catalysts via the Synergistic Effect of Metallic Nickel and Nickel Phosphides in Dry Methane Reforming

Yu Shi, Shiwei Wang, Yiming Li, Fan Yang, Hongbo Yu, Yuting Chu, Tong Li\* and Hongfeng Yin \*

Ningbo Institute of Materials Technology and Engineering, Chinese Academy of Sciences, 1219 Zhongguan West Road, Ningbo, Zhejiang 315201, P. R. China

\*Correspondence: litong@nimte.ac.cn, yinhf@nimte.ac.cn;

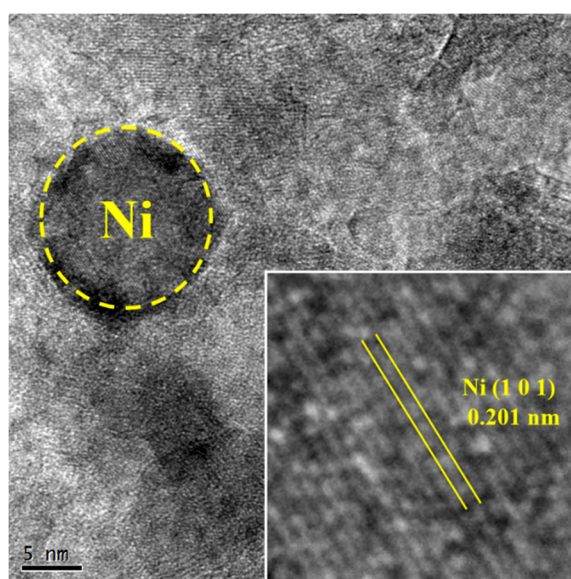

Figure S1. HRTEM image of the reduced Ni/Al<sub>2</sub>O<sub>3</sub> catalysts (the inset is the magnified image of Ni).

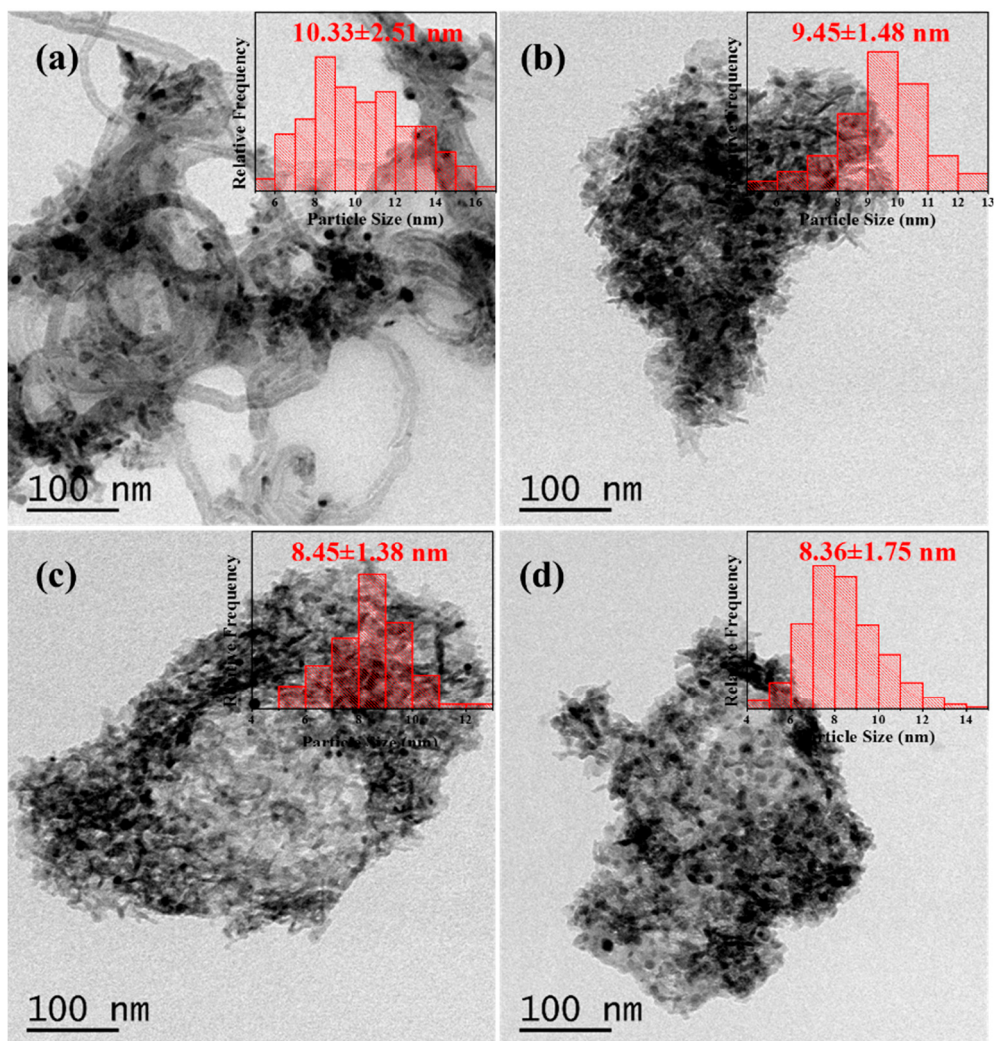

Figure S2. TEM images and corresponding size distributions of spent (a)  $\text{Ni}/\text{Al}_2\text{O}_3$ ; (b)  $\text{NiP-4}/\text{Al}_2\text{O}_3$ ; (c)  $\text{NiP-3}/\text{Al}_2\text{O}_3$ ; (d)  $\text{NiP-2}/\text{Al}_2\text{O}_3$ .

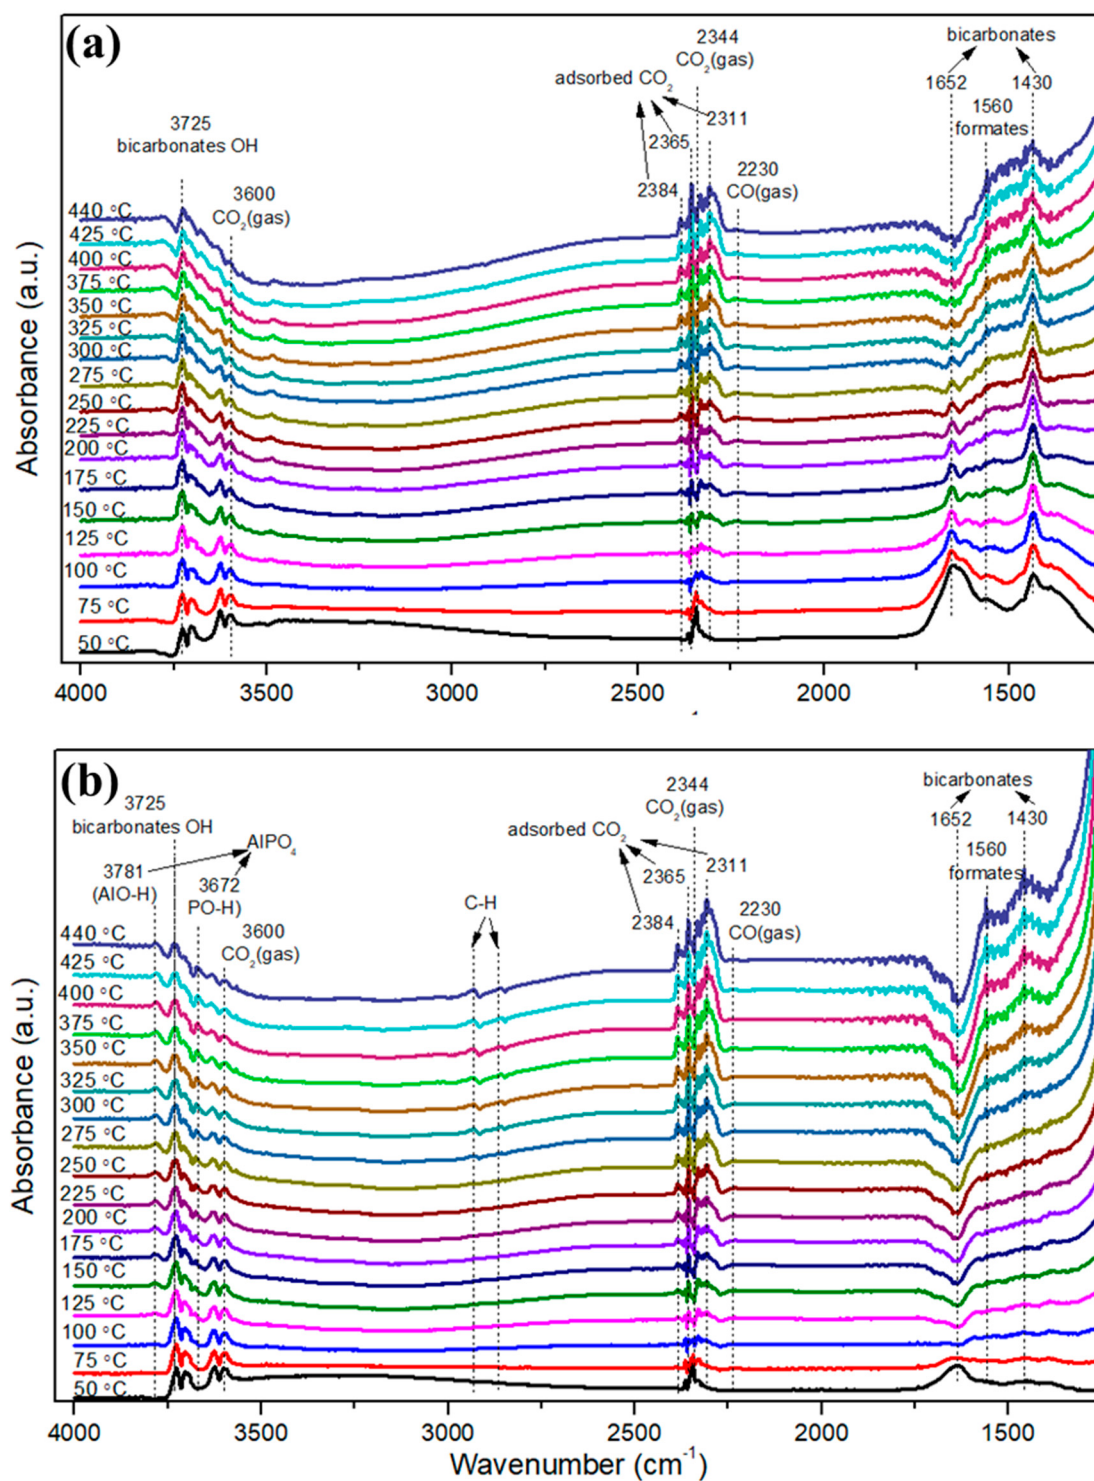

Figure S3. DRIFTS spectra of CO<sub>2</sub> temperature programmed adsorption at different temperatures over (a) Ni/Al<sub>2</sub>O<sub>3</sub> and (b) NiP-2/Al<sub>2</sub>O<sub>3</sub>.
